# Supplementary material for: A RRKM study and a DFT assessment on gas-phase fragmentation of formamide–M2+ (M = Ca, Sr)
Source: Royal Society of Chemistry journal article supplement (doi:10.1039/c4cp01756k), 2014-01-01
Supplement: c4cp01756k2.pdf [file c4cp01756k2.pdf]

**RRKM study and DFT assessment for gas-phase fragmentation of  
formamide- $M^{2+}$  ( $M=Ca, Sr$ )**

Ana Martín-Sómer<sup>1</sup>, Marie-Pierre Gaigeot<sup>2</sup>, Manuel Yáñez<sup>1\*</sup> and Riccardo Spezia<sup>2\*</sup>

*Contribution from <sup>1</sup>Departamento de Química, Facultad de Ciencias, Módulo 13.  
Universidad Autónoma de Madrid. Cantoblanco, 28049-Madrid. Spain, and  
<sup>2</sup>Laboratoire Analyse et Modélisation pour la Biologie et l'Environnement (LAMBE),  
UMR-CNRS 8587, Université d'Evry val d'Essonne, Blvd. F. Mitterrand, Bat.  
Maupertuis, F-91025 Evry, France.*

**Supporting Information  
(20 pages)**

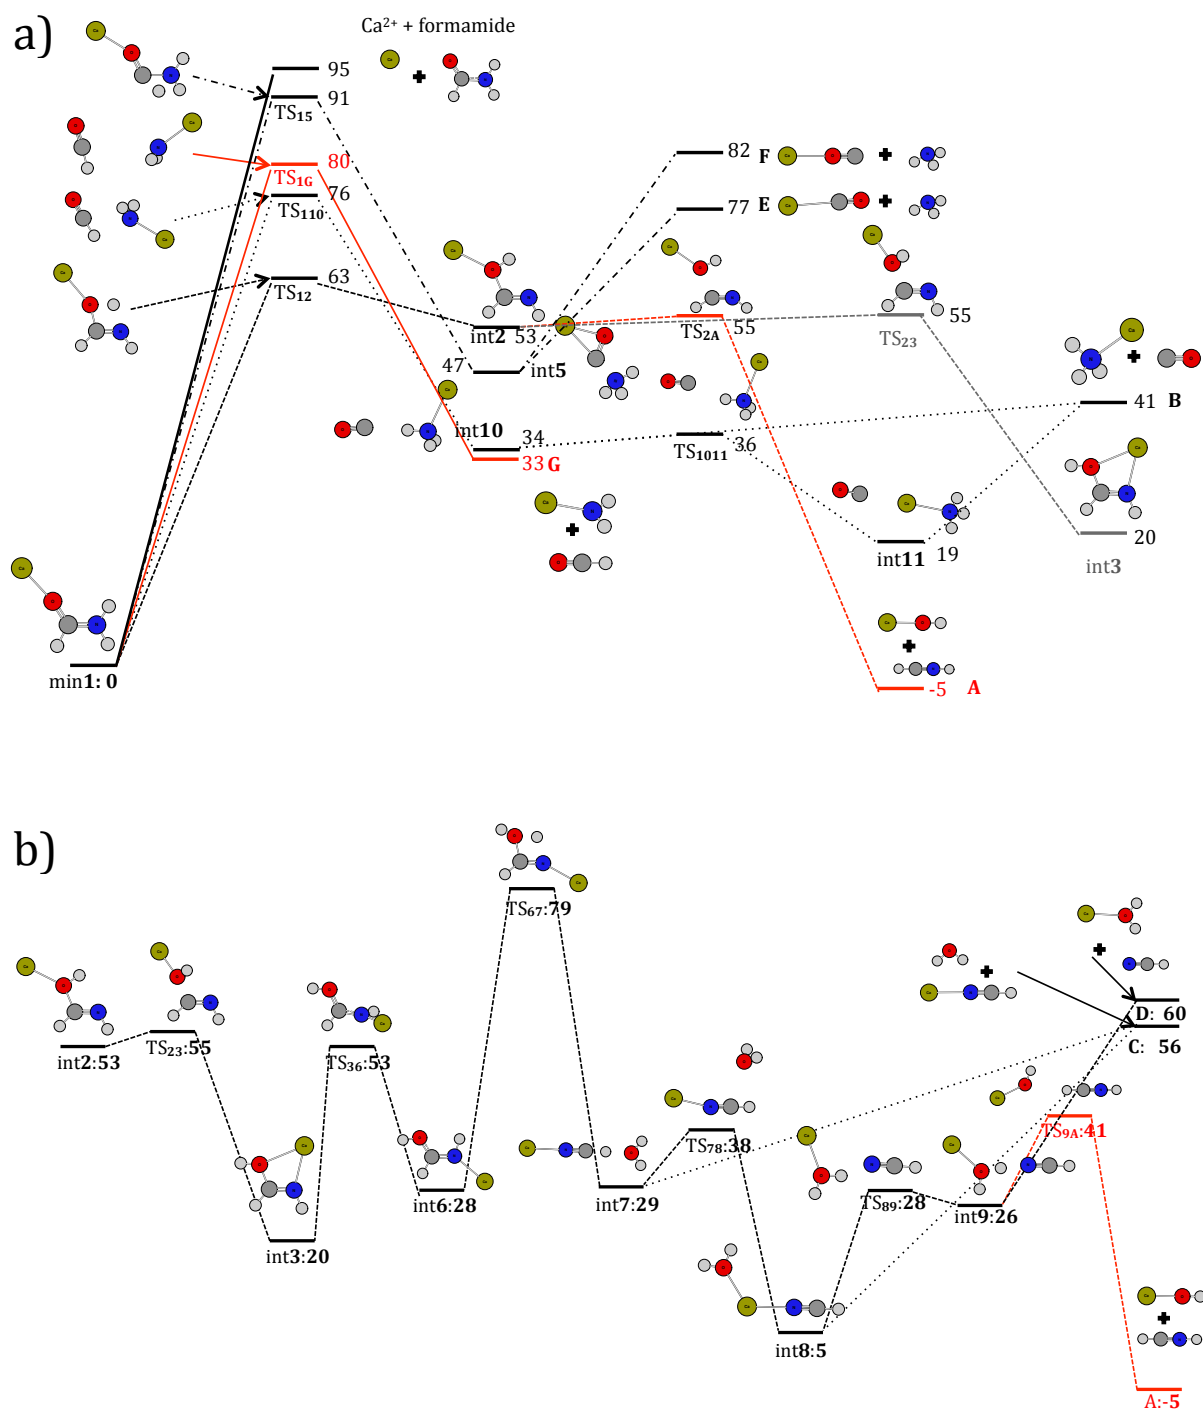

**Figure S.1.** Energy profile of the different reaction mechanisms with origin in **a)** the global minimum **1** and **b)** the local minimum **int2** for formamide- $\text{Ca}^{2+}$  system. All values in kcal/mol.

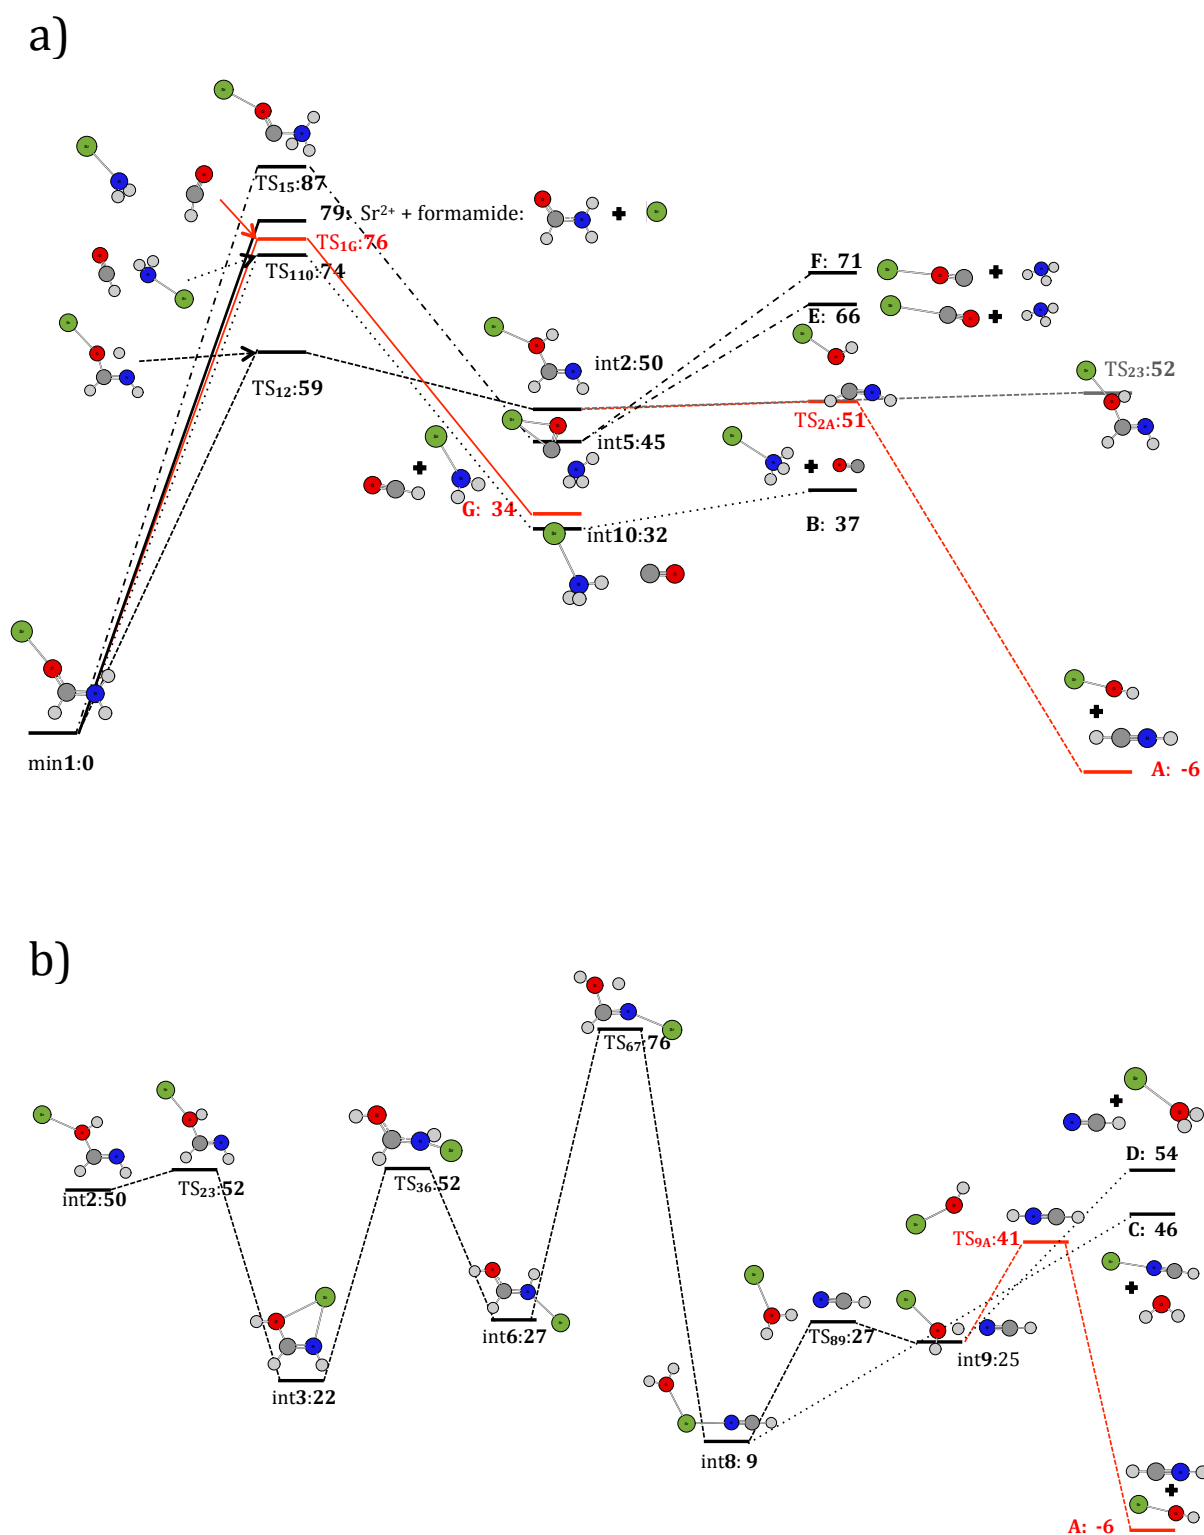

**Figure S.2:** Energy profile of the different reaction mechanisms with origin in a) the global minimum 1 and b) the local minimum int2 for formamide-Sr<sup>2+</sup> system. All values in kcal/mol.

## Rotational constant A:

| Structure                          | B3LYP/6-31G(d) | G96LYP/6-31G(d) | MP2/6-31G(d) | BLYP/6-31G(d) |
|------------------------------------|----------------|-----------------|--------------|---------------|
| Formamide                          | -0.9           | -2.4            | -1.9         | -2.8          |
| A_CaOH <sup>+</sup>                | 0.0            | 0.0             | 0.0          | 0.0           |
| A_HCNH <sup>+</sup>                | 0.0            | 0.0             | 0.0          | 0.0           |
| B_CaNH <sub>3</sub> <sup>2+</sup>  | -0.2           | -1.4            | 0.1          | -1.8          |
| B_CO                               | 0.0            | 0.0             | 0.0          | 0.0           |
| C_CaHCN <sup>2+</sup>              | 0.0            | 0.0             | 0.0          | 0.0           |
| C_H <sub>2</sub> O                 | -3.4           | -6.7            | -2.7         | -7.6          |
| D_CaH <sub>2</sub> O <sup>2+</sup> | -0.1           | -1.4            | -0.1         | -1.7          |
| D_HCN                              | 0.0            | 0.0             | 0.0          | 0.0           |
| E_CaCO <sup>2+</sup>               | 0.0            | 0.0             | 0.0          | 0.0           |
| E_NH <sub>3</sub>                  | -1.9           | -4.0            | -1.0         | -4.4          |
| F_CaOC <sup>2+</sup>               | 0.0            | 0.0             | 0.0          | 0.0           |
| F_NH <sub>3</sub>                  | -1.9           | -4.0            | -1.0         | -4.4          |
| G_CaNH <sub>2</sub> <sup>+</sup>   | -6.3           | -13.6           | -0.1         | -16.3         |
| G_OCH <sup>+</sup>                 | 0.0            | 0.0             | 0.0          | 0.0           |
| int_10                             | 1.3            | 2.8             | -2.7         | 1.5           |
| int_11                             | 0.0            | -1.3            | 0.2          | -1.9          |
| int_1                              | 0.4            | 0.1             | 2.2          | 0.1           |
| int_2                              | -0.5           | -2.7            | -0.2         | -3.1          |
| int_3                              | -1.3           | -2.6            | -1.7         | -3.0          |
| int_5                              | -0.3           | -4.7            | -3.6         | -4.9          |
| int_6                              | -0.6           | -2.9            | -1.5         | -3.4          |
| int_7                              | -14.0          | -31.5           | 0.7          | -33.2         |
| int_8                              | 2683.2         | 2673.1          | 2689.3       | 2642.1        |
| int_9                              | -15.0          | -10.6           | -26.4        | -11.8         |
| TS_10_11                           | 0.0            | -2.7            | 6.1          | -1.1          |
| TS_1_10                            | -2.7           | -9.6            | -0.6         | -9.5          |
| TS_1_1                             | -1.6           | -3.5            | -2.3         | -4.0          |
| TS_1_2                             | 0.0            | -1.1            | -1.6         | -1.2          |
| TS_1_5                             | 1.8            | -0.8            | 0.4          | -1.3          |
| TS_1_G                             | 3.4            | -5.0            | 29.4         | -3.1          |
| TS_2_3                             | -8.9           | -13.7           | -11.0        | -14.4         |
| TS_2_A                             | 1.4            | -0.8            | 1.4          | -1.0          |
| TS_3_6                             | -8.8           | -11.6           | -9.0         | -12.4         |
| TS_6_7                             | 0.0            | -2.7            | -0.5         | -2.0          |
| TS_7_8                             | -3.1           | -5.7            | 1.9          | 0.1           |
| TS_8_9                             | 4.5            | -2.4            | 10.8         | 0.7           |
| TS_9_A                             | 18.5           | 33.7            | 21.7         | 67.0          |

**Table S.1-a** : Relative errors (%) in C rotational constant. M=Ca.

## Rotational constant **B**:

| Structure                          | B3LYP/6-31G(d) | G96LYP/6-31G(d) | MP2/6-31G(d) | BLYP/6-31G(d) |
|------------------------------------|----------------|-----------------|--------------|---------------|
| Formamide                          | -0.9           | -2.7            | -1.2         | -2.8          |
| A_CaOH <sup>+</sup>                | -9.0           | -9.7            | -9.9         | -10.1         |
| A_HCNH <sup>+</sup>                | -1.5           | -3.0            | -3.3         | -3.1          |
| B_CaNH <sub>3</sub> <sup>2+</sup>  | -6.2           | -7.5            | -7.3         | -7.6          |
| B_CO                               | -2.2           | -4.2            | -4.5         | -4.3          |
| C_CaHCN <sup>2+</sup>              | -5.3           | -6.6            | -7.6         | -6.4          |
| C_H <sub>2</sub> O                 | -0.3           | -1.2            | -0.7         | -1.2          |
| D_CaH <sub>2</sub> O <sup>2+</sup> | -5.2           | -6.5            | -6.7         | -6.3          |
| D_HCN                              | -1.8           | -3.6            | -4.6         | -3.7          |
| E_CaCO <sup>2+</sup>               | -4.4           | -5.8            | -5.7         | -5.2          |
| E_NH <sub>3</sub>                  | -1.8           | -3.9            | -0.9         | -4.3          |
| F_CaOC <sup>2+</sup>               | -3.3           | -5.6            | -6.0         | -5.0          |
| F_NH <sub>3</sub>                  | -1.8           | -3.9            | -0.9         | -4.3          |
| G_CaNH <sub>2</sub> <sup>+</sup>   | -11.4          | -14.1           | -11.0        | -15.2         |
| G_OCH <sup>+</sup>                 | -2.0           | -3.8            | -4.5         | -4.0          |
| int_10                             | -4.2           | -6.3            | -6.4         | -4.7          |
| int_11                             | 0.0            | -1.4            | -0.9         | -1.2          |
| int_1                              | -4.6           | -6.0            | -5.7         | -6.0          |
| int_2                              | -3.1           | -4.7            | -4.1         | -4.9          |
| int_3                              | -4.5           | -6.6            | -5.3         | -6.1          |
| int_5                              | -6.3           | -9.7            | -6.1         | -9.6          |
| int_6                              | -4.9           | -6.1            | -6.1         | -6.1          |
| int_7                              | -4.2           | -4.5            | -7.9         | -4.4          |
| int_8                              | -24.3          | -25.3           | -25.7        | -25.1         |
| int_9                              | -3.8           | -5.5            | -4.4         | -5.1          |
| TS_10_11                           | 0.0            | -0.9            | -7.2         | 0.0           |
| TS_1_10                            | 1.2            | 0.6             | -1.0         | 0.0           |
| TS_1_1                             | -5.4           | -6.7            | -6.7         | -6.7          |
| TS_1_2                             | -4.0           | -5.6            | -4.9         | -5.6          |
| TS_1_5                             | -4.3           | -5.8            | -5.0         | -5.6          |
| TS_1_G                             | -13.0          | -9.2            | 27.3         | -11.9         |
| TS_2_3                             | -0.6           | -1.1            | -0.9         | -1.1          |
| TS_2_A                             | -1.3           | -5.1            | -4.9         | -5.7          |
| TS_3_6                             | -3.0           | -3.8            | -3.8         | -3.7          |
| TS_6_7                             | -5.5           | -6.9            | -7.1         | -7.1          |
| TS_7_8                             | -2.0           | -1.6            | -11.7        | -3.3          |
| TS_8_9                             | -9.9           | -7.3            | -16.5        | -8.8          |
| TS_9_A                             | -22.1          | -21.1           | -21.7        | -24.2         |

**Table S.1-b** : Relative errors (%) in B rotational constant. M=Ca.

## Rotational constant C:

| Structure                          | B3LYP/6-31G(d) | G96LYP/6-31G(d) | MP2/6-31G(d) | BLYP/6-31G(d) |
|------------------------------------|----------------|-----------------|--------------|---------------|
| Formamide                          | -0.9           | -2.7            | -1.2         | -2.8          |
| A_CaOH <sup>+</sup>                | -9.0           | -9.7            | -9.9         | -10.1         |
| A_HCNH <sup>+</sup>                | -1.5           | -3.0            | -3.3         | -3.1          |
| B_CaNH <sub>3</sub> <sup>2+</sup>  | -6.2           | -7.5            | -7.3         | -7.6          |
| B_CO                               | -2.2           | -4.2            | -4.5         | -4.3          |
| C_CaHCN <sup>2+</sup>              | -5.3           | -6.6            | -7.6         | -6.4          |
| C_H <sub>2</sub> O                 | -1.4           | -3.2            | -1.4         | -3.5          |
| D_CaH <sub>2</sub> O <sup>2+</sup> | -5.1           | -6.4            | -6.6         | -6.2          |
| D_HCN                              | -1.8           | -3.6            | -4.6         | -3.7          |
| E_CaCO <sup>2+</sup>               | -4.4           | -5.8            | -5.7         | -5.2          |
| E_NH <sub>3</sub>                  | 0.0            | -0.8            | -0.3         | -0.7          |
| F_CaOC <sup>2+</sup>               | -3.3           | -5.6            | -6.0         | -5.0          |
| F_NH <sub>3</sub>                  | 0.0            | -0.8            | -0.3         | -0.7          |
| G_CaNH <sub>2</sub> <sup>+</sup>   | -11.0          | -13.6           | -10.8        | -14.6         |
| G_OCH <sup>+</sup>                 | -2.0           | -3.8            | -4.5         | -4.0          |
| int_10                             | -3.9           | -5.7            | -6.1         | -4.3          |
| int_11                             | 0.0            | -1.4            | -0.9         | -1.2          |
| int_1                              | -4.4           | -5.8            | -5.4         | -5.8          |
| int_2                              | -3.1           | -4.7            | -4.0         | -4.8          |
| int_3                              | -3.7           | -5.6            | -4.4         | -5.3          |
| int_5                              | -5.8           | -9.3            | -5.9         | -9.3          |
| int_6                              | -4.8           | -6.0            | -6.0         | -6.1          |
| int_7                              | -4.2           | -4.4            | -7.9         | -4.3          |
| int_8                              | -14.8          | -16.0           | -16.4        | -15.8         |
| int_9                              | -4.3           | -5.7            | -5.6         | -5.4          |
| TS_10_11                           | 0.0            | -1.1            | -5.7         | -0.1          |
| TS_1_10                            | 1.2            | 0.7             | -1.0         | 0.0           |
| TS_1_1                             | -4.5           | -6.0            | -5.7         | -6.0          |
| TS_1_2                             | -3.9           | -5.4            | -4.7         | -5.5          |
| TS_1_5                             | -4.2           | -5.6            | -4.9         | -5.5          |
| TS_1_G                             | -12.1          | -8.6            | 27.6         | -11.0         |
| TS_2_3                             | -1.3           | -2.3            | -1.9         | -2.4          |
| TS_2_A                             | -1.3           | -5.1            | -4.8         | -5.6          |
| TS_3_6                             | -3.5           | -4.4            | -4.2         | -4.3          |
| TS_6_7                             | -5.2           | -6.6            | -6.8         | -6.8          |
| TS_7_8                             | -2.2           | -2.3            | -9.7         | -2.7          |
| TS_8_9                             | -8.3           | -6.8            | -13.9        | -7.7          |
| TS_9_A                             | -21.8          | -20.7           | -21.3        | -23.6         |

**Table S.1-c** : Relative errors (%) in C rotational constant. M=Ca.

## Rotational constant A:

| Structure                           | B3LYP/6-31G(d) | G96LYP/6-31G(d) | MP2/6-31G(d) |
|-------------------------------------|----------------|-----------------|--------------|
| Formamide                           | 2.1            | 0.6             | 1.0          |
| A_HCNH <sup>+</sup>                 | 0.0            | 0.0             | 0.0          |
| A_SrOH <sup>+</sup>                 | 0.0            | 0.0             | 0.0          |
| B_CO                                | 0.0            | 0.0             | 0.0          |
| B_SrNH <sub>3</sub> <sup>2+</sup>   | 2.2            | 1.0             | 2.3          |
| C_H <sub>2</sub> O                  | -2.1           | -5.2            | -1.4         |
| C_HCNSr <sup>2+</sup>               | -3.2           | -7.9            | -10.1        |
| D_HCN                               | 0.0            | 0.0             | 0.0          |
| D_Sr-H <sub>2</sub> O <sup>2+</sup> | 2.8            | 1.7             | 2.7          |
| E_NH <sub>3</sub>                   | -0.3           | -2.3            | 0.6          |
| E_OC-Sr <sup>2+</sup>               | 0.0            | 0.0             | 0.0          |
| F_CO-Sr <sup>2+</sup>               | 0.0            | 0.0             | 0.0          |
| F_NH <sub>3</sub>                   | -0.3           | -2.3            | 0.6          |
| G_SrNH <sub>2</sub> <sup>+</sup>    | -6.1           | -11.2           | 2.4          |
| G_OCH <sup>+</sup>                  | 0.0            | 0.0             | 0.0          |
| min1                                | 6.2            | 5.9             | 9.4          |
| int2                                | 2.8            | 0.5             | 3.8          |
| int3                                | 0.9            | 0.0             | 0.1          |
| int6                                | 2.9            | 1.0             | 2.8          |
| int8                                | 159.2          | 1184.1          | 4998.3       |
| int9                                | -13.8          | -12.0           | -29.3        |
| int10                               | 20.4           | 17.6            | 14.1         |
| int5                                | 4.7            | -4.4            | 2.6          |
| TS_1_1                              | 0.7            | -1.4            | 0.0          |
| TS_1_2                              | 2.5            | 1.6             | 0.7          |
| TS_1_10                             | 14.6           | 2.7             | 20.3         |
| TS_1_5                              | 3.1            | -0.6            | 1.7          |
| TS_2_3                              | -5.3           | -11.6           | -6.4         |
| TS_2_A                              | 19.3           | 18.0            | 20.9         |
| TS_3_6                              | -4.5           | -7.3            | -6.3         |
| TS_6_8                              | 3.9            | 0.1             | 3.4          |
| TS_8_9                              | 27.0           | 15.3            | 28.7         |
| TS_9_A                              | 169.4          | 179.0           | 96.7         |
| TS_1_G                              | 13.2           | 2.7             | 268.4        |

**Table S.2-a:** Relative errors (%) in A rotational constant. M=Sr.

## Rotational constant **B**:

| Structure                           | B3LYP/6-31G(d) | G96LYP/6-31G(d) | MP2/6-31G(d) |
|-------------------------------------|----------------|-----------------|--------------|
| Formamide                           | 1.7            | -0.1            | 1.4          |
| A_HCNH <sup>+</sup>                 | 1.6            | 0.0             | -0.3         |
| A_SrOH <sup>+</sup>                 | -6.9           | -8.2            | -7.6         |
| B_CO                                | 1.9            | -0.1            | -0.4         |
| B_SrNH <sub>3</sub> <sup>2+</sup>   | -3.5           | -4.8            | -5.3         |
| C_H <sub>2</sub> O                  | 3.0            | 2.0             | 2.6          |
| C_HCNSr <sup>2+</sup>               | -3.6           | -5.0            | -6.4         |
| D_HCN                               | 1.9            | 0.0             | -1.1         |
| D_Sr-H <sub>2</sub> O <sup>2+</sup> | -3.4           | -4.9            | -5.1         |
| E_NH <sub>3</sub>                   | -0.3           | -2.3            | 0.6          |
| E_OC-Sr <sup>2+</sup>               | -3.0           | -4.6            | -5.0         |
| F_CO-Sr <sup>2+</sup>               | -2.9           | -6.2            | -6.1         |
| F_NH <sub>3</sub>                   | -0.3           | -2.3            | 0.6          |
| G_SrNH <sub>2</sub> <sup>+</sup>    | -10.1          | -12.7           | -10.8        |
| G_OCH <sup>+</sup>                  | 1.9            | 0.0             | -0.8         |
| min1                                | -3.6           | -5.1            | -5.1         |
| int2                                | -1.6           | -3.4            | -3.2         |
| int3                                | -3.1           | -6.9            | -3.7         |
| int6                                | -2.5           | -3.8            | -4.6         |
| int8                                | -19.0          | -26.1           | -27.7        |
| int9                                | -3.0           | -4.7            | -2.4         |
| int10                               | -7.1           | -8.2            | -9.4         |
| int5                                | -5.7           | -11.2           | -5.9         |
| TS_1_1                              | -3.7           | -5.4            | -5.7         |
| TS_1_2                              | -2.3           | -4.1            | -3.5         |
| TS_1_10                             | 1.9            | 1.4             | -0.3         |
| TS_1_5                              | -1.1           | -2.9            | -2.7         |
| TS_2_3                              | 0.7            | 0.6             | -0.8         |
| TS_2_A                              | 6.9            | 4.1             | 4.7          |
| TS_3_6                              | -1.8           | -2.7            | -2.7         |
| TS_6_8                              | -3.6           | -4.9            | -5.8         |
| TS_8_9                              | -18.5          | -16.0           | -22.4        |
| TS_9_A                              | -24.0          | -23.4           | -23.5        |
| TS_1_G                              | -14.6          | -10.5           | -5.5         |

**Table S.2-b:** Relative errors (%) in A rotational constant. M=Sr.



## Rotational constant C:

| Structure                           | B3LYP/6-31G(d) | G96LYP/6-31G(d) | MP2/6-31G(d) |
|-------------------------------------|----------------|-----------------|--------------|
| Formamide                           | 1.8            | 0.0             | 1.5          |
| A_HCNH <sup>+</sup>                 | 1.6            | 0.0             | -0.3         |
| A_SrOH <sup>+</sup>                 | -6.9           | -8.2            | -7.6         |
| B_CO                                | 1.9            | -0.1            | -0.4         |
| B_SrNH <sub>3</sub> <sup>2+</sup>   | -3.5           | -4.8            | -5.3         |
| C_H <sub>2</sub> O                  | 1.2            | -0.6            | 1.2          |
| C_HCNSr <sup>2+</sup>               | -3.6           | -5.0            | -6.4         |
| D_HCN                               | 1.9            | 0.0             | -1.1         |
| D_Sr-H <sub>2</sub> O <sup>2+</sup> | -3.3           | -4.9            | -5.0         |
| E_NH <sub>3</sub>                   | 3.2            | 2.4             | 2.8          |
| E_OC-Sr <sup>2+</sup>               | -3.0           | -4.6            | -5.0         |
| F_CO-Sr <sup>2+</sup>               | -2.9           | -6.2            | -6.1         |
| F_NH <sub>3</sub>                   | 3.2            | 2.4             | 2.8          |
| G_SrNH <sub>2</sub> <sup>+</sup>    | -9.7           | -12.3           | -10.6        |
| G_OCH <sup>+</sup>                  | 1.9            | 0.0             | -0.8         |
| min1                                | -3.3           | -4.9            | -4.7         |
| int2                                | -1.5           | -3.3            | -3.1         |
| int3                                | -2.4           | -5.8            | -3.1         |
| int6                                | -2.4           | -3.7            | -4.4         |
| int8                                | -7.8           | -11.5           | -13.2        |
| int9                                | -3.5           | -5.0            | -3.7         |
| int10                               | -5.5           | -6.7            | -8.0         |
| int5                                | -5.2           | -10.9           | -5.5         |
| TS_1_1                              | -3.0           | -4.8            | -4.8         |
| TS_1_2                              | -2.2           | -3.9            | -3.4         |
| TS_1_10                             | 1.8            | 1.4             | -0.4         |
| TS_1_5                              | -1.1           | -2.8            | -2.7         |
| TS_2_3                              | 0.3            | -0.3            | -1.3         |
| TS_2_A                              | 6.4            | 3.7             | 4.4          |
| TS_3_6                              | -2.0           | -3.0            | -3.0         |
| TS_6_8                              | -3.3           | -4.7            | -5.5         |
| TS_8_9                              | -15.0          | -13.3           | -18.6        |
| TS_9_A                              | -23.3          | -22.6           | -22.8        |
| TS_1_G                              | -13.8          | -10.0           | -2.5         |

**Table S.2-c:** Relative errors (%) in C rotational constant. M=Sr.

| Structure             | Absolute error (kcal/mol) |                      |                   |                    | Relative error(%)   |                      |                   |                    |
|-----------------------|---------------------------|----------------------|-------------------|--------------------|---------------------|----------------------|-------------------|--------------------|
|                       | B3LYP <sup>a)</sup>       | G96LYP <sup>a)</sup> | MP2 <sup>a)</sup> | BLYP <sup>a)</sup> | B3LYP <sup>a)</sup> | G96LYP <sup>a)</sup> | MP2 <sup>a)</sup> | BLYP <sup>a)</sup> |
| Form/Ca <sup>2+</sup> | 6.59                      | 11.15                | 9.23              | 7.22               | -6.9                | -11.7                | -9.7              | -7.6               |
| A                     | 25.29                     | 21.07                | 17.28             | 20.89              | -528.6              | -440.5               | -361.2            | -436.6             |
| B                     | 1.28                      | 4.97                 | 10.51             | 2.64               | -3.1                | -12.1                | -25.5             | -6.4               |
| C                     | 2.35                      | 1.54                 | 9.93              | 0.73               | 4.2                 | -2.7                 | -17.6             | 1.3                |
| D                     | 1.64                      | 2.71                 | 12.32             | 0.38               | 2.7                 | -4.5                 | -20.4             | -0.6               |
| E                     | 1.16                      | 6.22                 | 11.60             | 3.91               | -1.5                | -8.0                 | -15.0             | -5.0               |
| F                     | 2.51                      | 5.65                 | 9.43              | 3.22               | -3.1                | -6.9                 | -11.5             | -3.9               |
| G                     | 19.41                     | 12.64                | 13.67             | 11.43              | 58.4                | 38.0                 | 41.1              | 34.4               |
| int10                 | 2.51                      | 4.97                 | 11.50             | 4.93               | -7.3                | -14.5                | -33.6             | -14.4              |
| int11                 | 4.03                      | 6.15                 | 13.79             | 6.67               | -21.1               | -32.2                | -72.1             | -34.8              |
| min1                  | 0.00                      | 0.00                 | 0.00              | 0.00               | 0.0                 | 0.0                  | 0.0               | 0.0                |
| int2                  | 2.00                      | 3.75                 | 4.72              | 4.50               | -3.8                | -7.1                 | -8.9              | -8.5               |
| int3                  | 2.49                      | 2.06                 | 5.05              | 2.75               | -12.1               | -10.0                | -24.6             | -13.3              |
| int4                  | 0.72                      | 2.53                 | 2.41              | 3.33               | -1.3                | -4.5                 | 4.3               | -6.0               |
| int5                  | 0.94                      | 3.04                 | 2.59              | 3.99               | -2.0                | -6.5                 | -5.5              | -8.5               |
| int6                  | 0.45                      | 1.59                 | 0.16              | 1.63               | -1.6                | -5.6                 | -0.6              | -5.8               |
| int7                  | 4.33                      | 1.93                 | 5.30              | 2.25               | 14.7                | 6.5                  | -18.0             | 7.6                |
| int8                  | 1.65                      | 0.81                 | 10.63             | 0.36               | 31.3                | 15.3                 | -201.9            | 6.9                |
| int9                  | 4.41                      | 2.02                 | 7.20              | 1.84               | 16.6                | 7.6                  | -27.1             | 6.9                |
| TS_10_11              | 4.20                      | 6.56                 | 13.48             | 6.58               | -11.6               | -18.2                | -37.3             | -18.2              |
| TS_1_10               | 4.95                      | 1.23                 | 2.28              | 2.90               | 6.5                 | -1.6                 | 3.0               | -3.8               |
| TS_1_1                | 4.85                      | 4.55                 | 7.04              | 5.51               | -16.7               | -15.7                | -24.3             | -19.0              |
| TS_1_2                | 0.86                      | 4.72                 | 3.61              | 4.93               | -1.4                | -7.5                 | -5.7              | -7.8               |
| TS_1_5                | 1.10                      | 3.72                 | 3.08              | 4.23               | 1.2                 | -4.1                 | 3.4               | -4.6               |
| TS_1_G                | 12.67                     | 2.31                 | 7.72              | 1.61               | 15.9                | 2.9                  | 9.7               | 2.0                |
| TS_2_3                | 1.71                      | 3.22                 | 4.33              | 3.86               | -3.1                | -5.9                 | -7.9              | -7.0               |
| TS_2_A                | 5.06                      | 0.89                 | 1.56              | 0.34               | 9.2                 | 1.6                  | 2.8               | -0.6               |
| TS_3_6                | 2.41                      | 1.06                 | 5.02              | 0.76               | 4.5                 | 2.0                  | 9.5               | 1.4                |
| TS_6_7                | 2.14                      | 2.59                 | 0.40              | 2.97               | 2.7                 | -3.3                 | 0.5               | -3.8               |
| TS_7_8                | 4.00                      | 2.23                 | 7.61              | 1.99               | 10.4                | 5.8                  | -19.8             | 5.2                |
| TS_8_9                | 3.34                      | 1.45                 | 8.66              | 1.13               | 11.8                | 5.1                  | -30.7             | 4.0                |
| TS_9_A                | 19.23                     | 15.20                | 11.01             | 14.65              | 47.0                | 37.2                 | 26.9              | 35.8               |

a) 6-31G(d) basis set

**Table S.3:** Absolute and relative errors (%) for relative energies computed with the four trial methods. M=Ca.

| Structure             | Absolute error (kcal/mol) |                      |                   |                      | Relative error(%)   |                      |                   |                      |
|-----------------------|---------------------------|----------------------|-------------------|----------------------|---------------------|----------------------|-------------------|----------------------|
|                       | B3LYP <sup>a)</sup>       | G96LYP <sup>a)</sup> | MP2 <sup>a)</sup> | G96LYP <sup>b)</sup> | B3LYP <sup>a)</sup> | G96LYP <sup>a)</sup> | MP2 <sup>a)</sup> | G96LYP <sup>b)</sup> |
| Form/Sr <sup>2+</sup> | 13.25                     | 18.74                | 16.41             | 6.14                 | -16.7               | -23.6                | -20.7             | -7.7                 |
| A                     | 45.16                     | 40.10                | 37.33             | 7.14                 | -755.1              | -670.4               | -624.2            | -119.4               |
| B                     | 4.80                      | 9.05                 | 14.61             | 2.29                 | -12.9               | -24.4                | -39.4             | -6.2                 |
| C                     | 4.93                      | 0.76                 | 8.09              | 0.78                 | 10.8                | 1.7                  | -17.7             | 1.7                  |
| D                     | 0.33                      | 5.21                 | 15.29             | 2.74                 | -0.6                | -9.6                 | -28.3             | -5.1                 |
| E                     | 2.23                      | 7.67                 | 12.44             | 0.02                 | -3.4                | -11.6                | -18.8             | 0.0                  |
| F                     | 4.32                      | 8.00                 | 11.97             | 1.44                 | -6.1                | -11.2                | -16.8             | -2.0                 |
| G                     | 33.58                     | 25.21                | 31.59             | 9.29                 | 99.9                | 75.0                 | 94.0              | 27.6                 |
| min1                  | 0.00                      | 0.00                 | 0.00              | 0.00                 | 0.0                 | 0.0                  | 0.0               | 0.0                  |
| int2                  | 3.96                      | 5.50                 | 6.26              | 1.03                 | -8.0                | -11.1                | -12.6             | -2.1                 |
| int3                  | 5.45                      | 5.20                 | 6.66              | 1.07                 | -24.5               | -23.4                | -29.9             | -4.8                 |
| int6                  | 2.97                      | 4.25                 | 2.11              | 0.01                 | -10.8               | -15.4                | -7.7              | 0.0                  |
| int8                  | 1.23                      | 0.18                 | 11.04             | 0.81                 | 13.2                | 1.9                  | -118.3            | 8.7                  |
| int9                  | 3.58                      | 1.42                 | 8.27              | 0.33                 | 14.4                | 5.7                  | -33.2             | 1.3                  |
| int10                 | 5.11                      | 7.74                 | 13.22             | 0.00                 | -16.0               | -24.3                | -41.5             | 0.0                  |
| int5                  | 0.56                      | 2.57                 | 0.09              | 1.16                 | 1.2                 | -5.7                 | 0.2               | 2.6                  |
| TS_1_1                | 6.23                      | 5.86                 | 7.45              | 0.03                 | -21.0               | -19.8                | -25.1             | -0.1                 |
| TS_1_2                | 0.32                      | 4.23                 | 2.46              | 1.74                 | -0.5                | -7.2                 | -4.2              | -2.9                 |
| TS_1_10               | 9.64                      | 2.83                 | 9.81              | 3.20                 | 13.0                | 3.8                  | 13.3              | 4.3                  |
| TS_1_5                | 4.38                      | 0.81                 | 6.75              | 0.41                 | 5.0                 | -0.9                 | 7.8               | -0.5                 |
| TS_2_3                | 3.89                      | 5.12                 | 6.06              | 1.09                 | -7.5                | -9.9                 | -11.7             | -2.1                 |
| TS_2_A                | 6.99                      | 3.97                 | 5.59              | 2.01                 | 13.6                | 7.7                  | 10.9              | 3.9                  |
| TS_3_6                | 2.00                      | 0.37                 | 5.54              | 0.92                 | 3.8                 | 0.7                  | 10.6              | 1.8                  |
| TS_6_8                | 3.02                      | 1.94                 | 1.73              | 0.96                 | 4.0                 | -2.5                 | 2.3               | -1.3                 |
| TS_8_9                | 2.15                      | 0.21                 | 9.95              | 0.56                 | 8.1                 | 0.8                  | -37.5             | 2.1                  |
| TS_9_A                | 35.87                     | 31.39                | 28.58             | 5.49                 | 87.7                | 76.7                 | 69.9              | 13.4                 |
| TS_1_G                | 25.91                     | 11.99                | 26.88             | 5.59                 | 34.1                | 15.8                 | 35.4              | 7.3                  |

a) 6-31G(d) basis set

b) 6-31+G(d,p) basis set

**Table S.4:** Absolute and relative errors (%) for relative energies computed with the four trial methods. M=Sr.

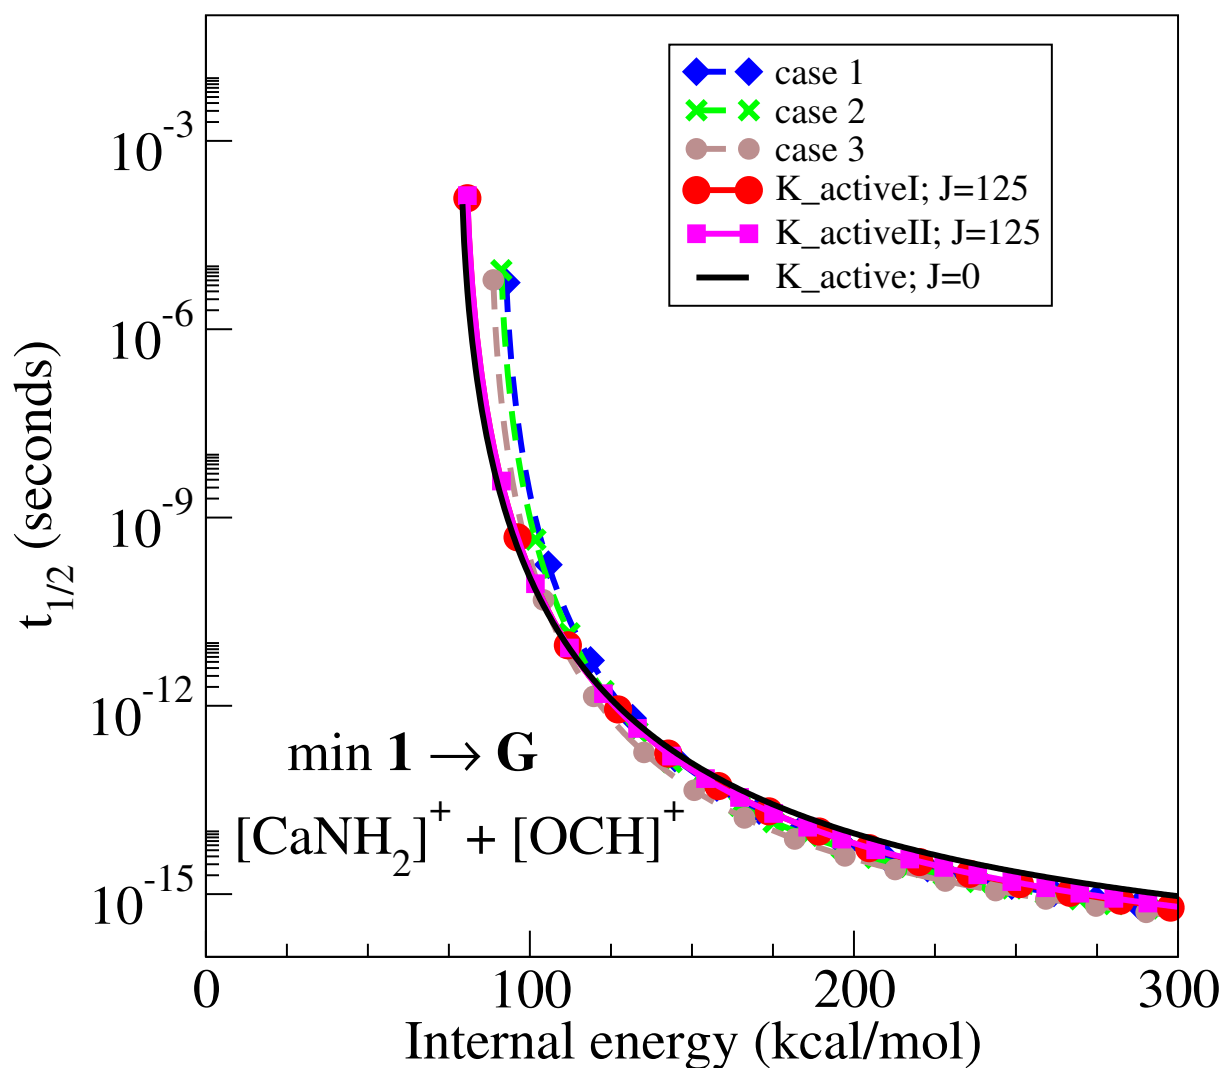

**Figure S.3-a:**  $k(E)$  computed at B3LYP/cc-pWCVTZ for  $\text{min1} \rightarrow \mathbf{G}$  ( $[\text{CaNH}_2]^+ + [\text{HCO}]^+$ ) reaction ( $M=\text{Ca}$ ), taking into account the rotational energy. The quantum  $K$  number can be treated as an active rotor (solid lines) with different values for the angular momentum  $J$ ; or as an adiabatic rotor (dashed lines), where all the rotational energy is placed on the  $x,y$ -axes (blue diamonds, dashed line)(*case1*) ; equally distributed among the three axes (green crosses, dashed line) (*case2*) or in the  $z$ -axis (brown circles, dashed line) (*case3*).

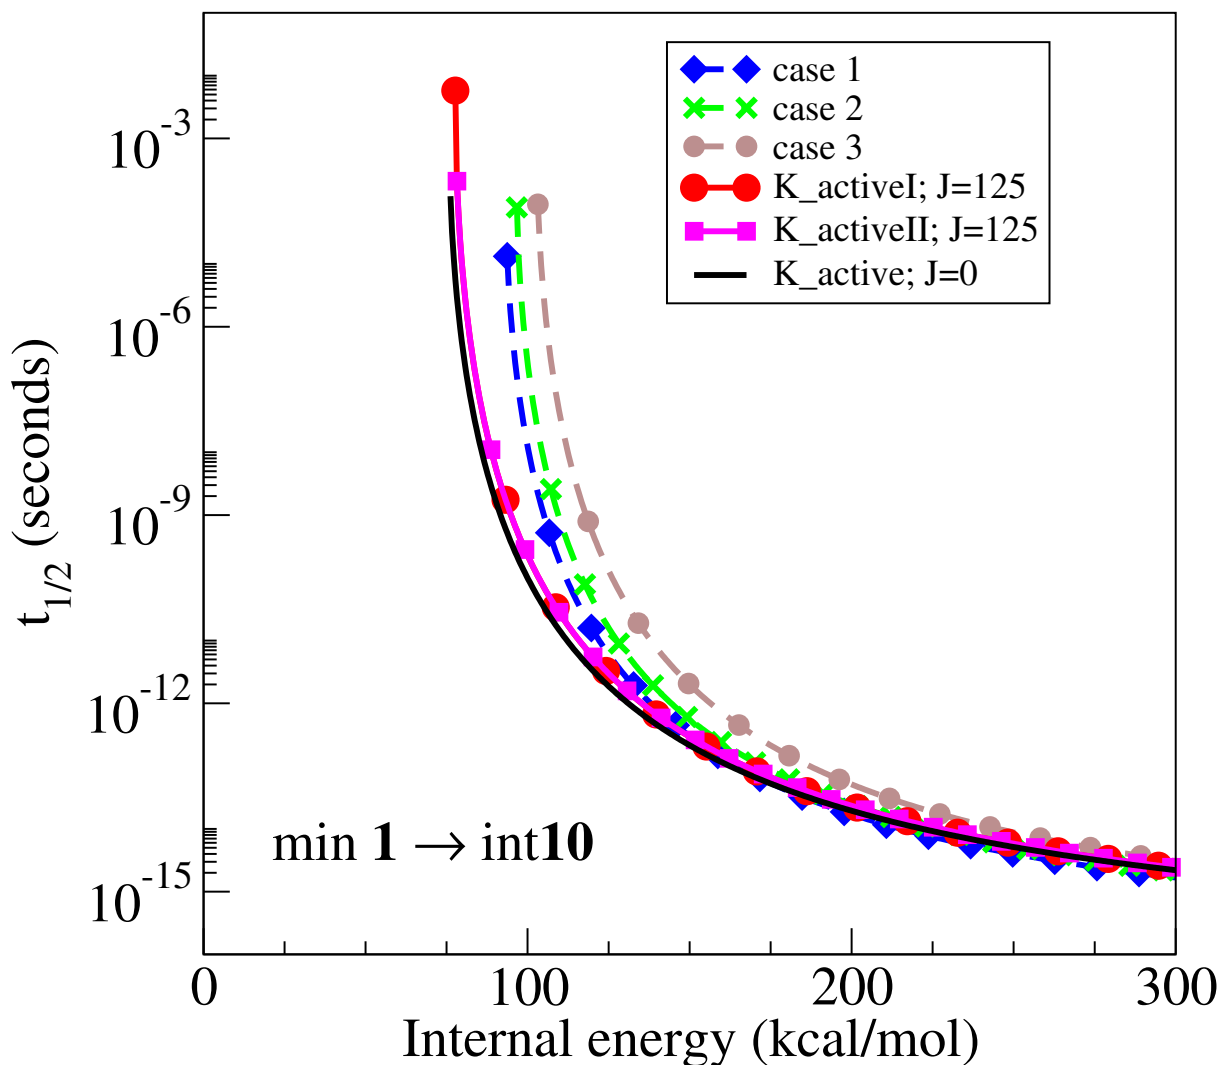

**Figure S.3-b:**  $k(E)$  computed at B3LYP/cc-pWCVTZ for  $\text{min1} \rightarrow \text{int10}$  reaction ( $M=\text{Ca}$ ), taking into account the rotational energy. The quantum  $K$  number can be treated as an active rotor (solid lines) with different values for the angular momentum  $J$ ; or as an adiabatic rotor (dashed lines), where all the rotational energy is placed on the  $x,y$ -axes (blue diamonds, dashed line)(*case1*) ; equally distributed among the three axes (green crosses, dashed line) (*case2*) or in the  $z$ -axis (brown circles, dashed line) (*case3*).

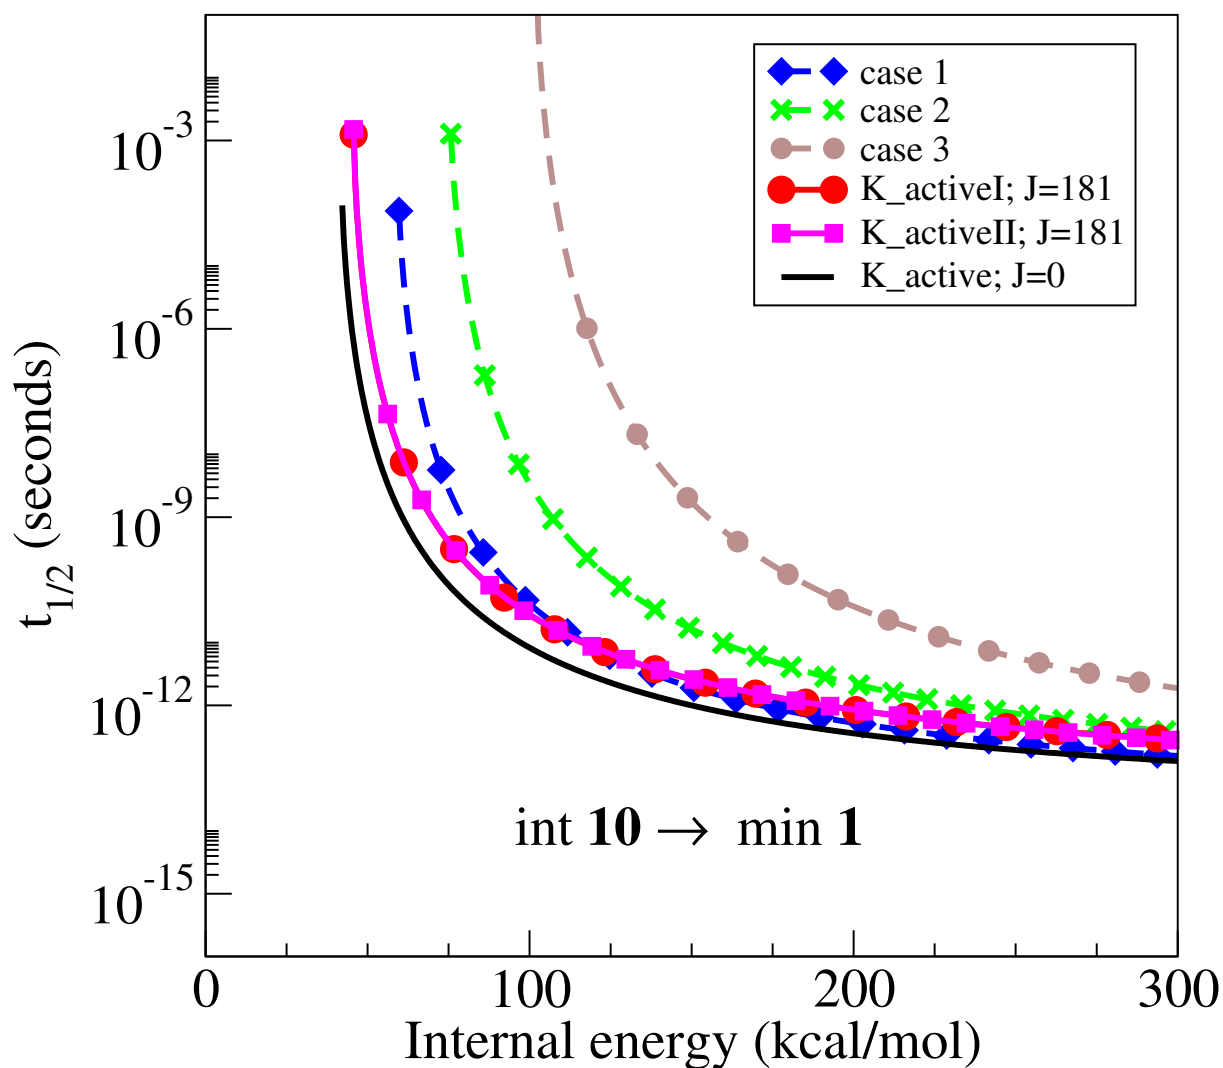

**Figure S.3-c:**  $k(E)$  computed at B3LYP/cc-pWCVTZ for  $\text{int}10 \rightarrow \text{min}1$  reaction ( $M=\text{Ca}$ ), taking into account the rotational energy. The quantum  $K$  number can be treated as an active rotor (solid lines) with different values for the angular momentum  $J$ ; or as an adiabatic rotor (dashed lines), where all the rotational energy is placed on the  $x,y$ -axes (blue diamonds, dashed line)(*case1*) ; equally distributed among the three axes (green crosses, dashed line) (*case2*) or in the  $z$ -axis (brown circles, dashed line) (*case3*).

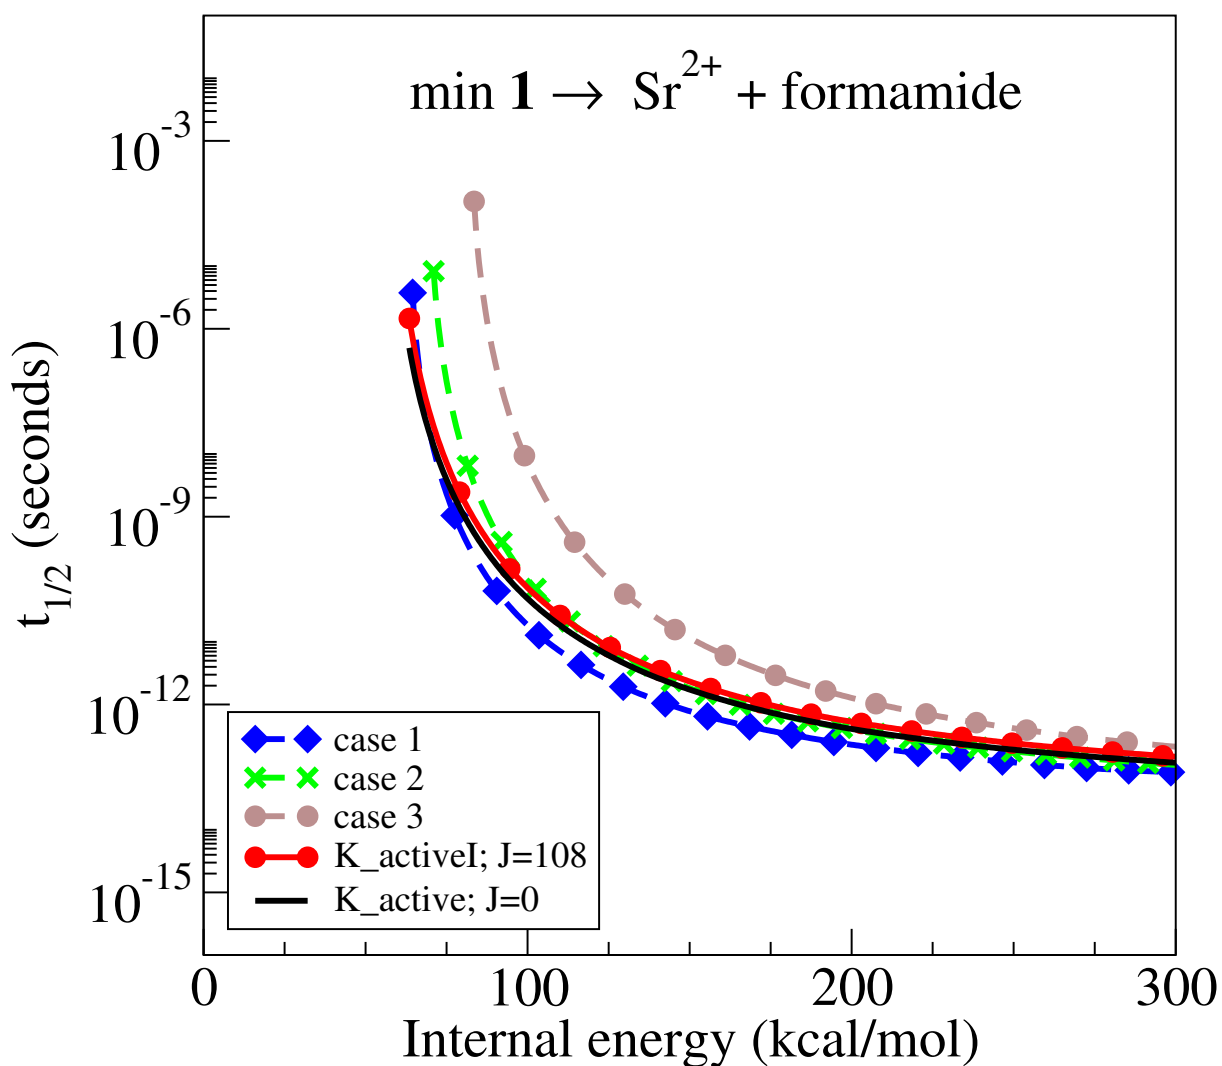

**Figure S.3-d:**  $k(E)$  computed at G96LYP/6-311+G(3df.2p) for  $\text{min1} \rightarrow \text{Sr}^{2+} + \text{formamide}$  reaction ( $M=\text{Sr}$ ), taking into account the rotational energy. The quantum  $K$  number can be treated as an active rotor (solid lines) with different values for the angular momentum  $J$ ; or as an adiabatic rotor (dashed lines), where all the rotational energy is placed on the  $x,y$ -axes (blue diamonds, dashed line) (*case1*) ; equally distributed among the three axes (green crosses, dashed line) (*case2*) or in the  $z$ -axis (brown circles, dashed line) (*case3*).

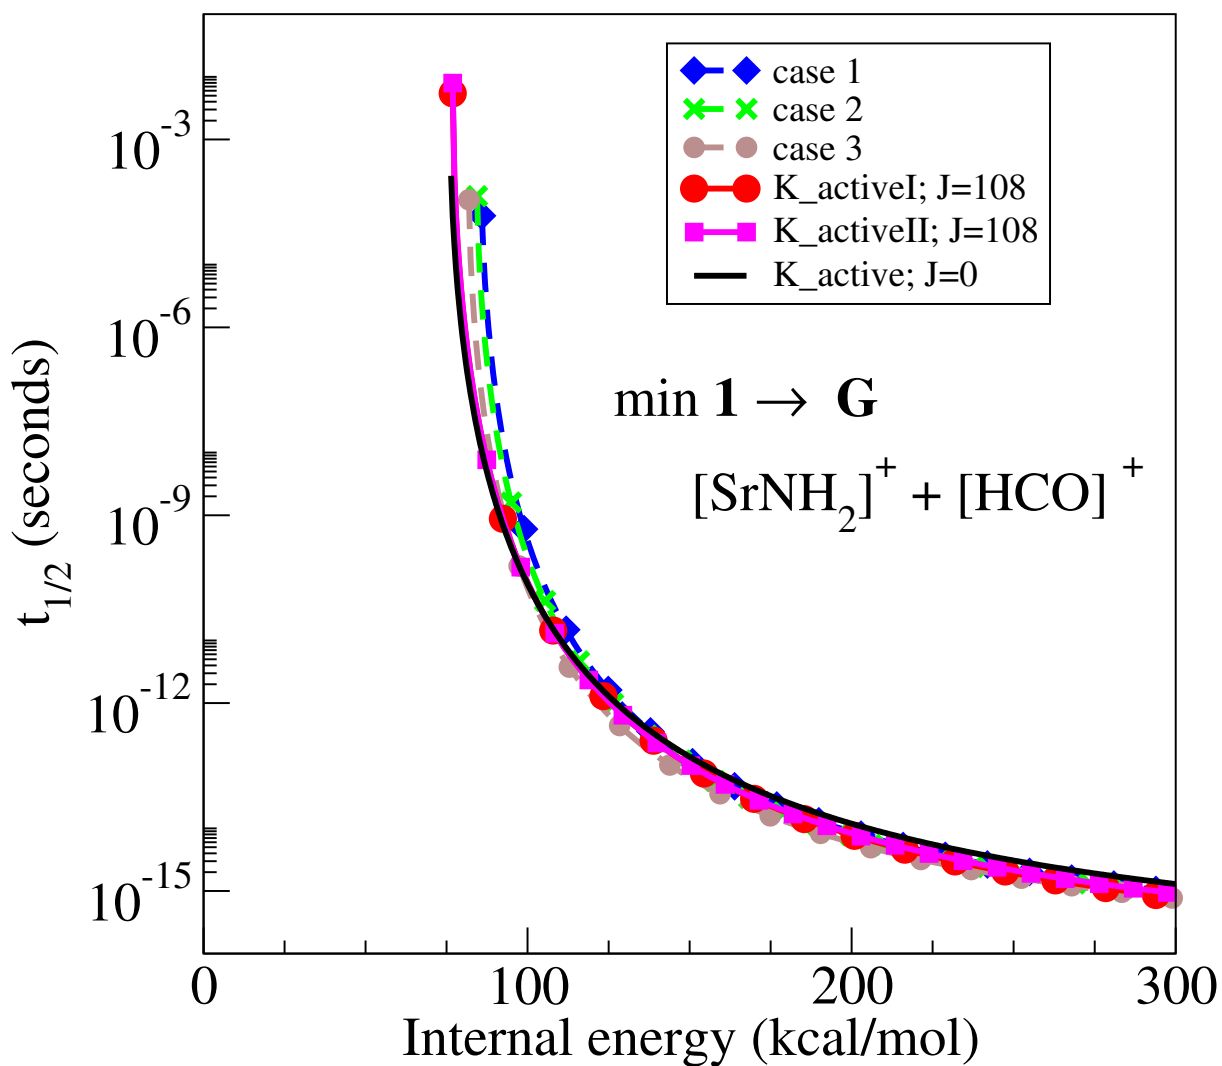

**Figure S.3-e:**  $k(E)$  computed at G96LYP/6-311+G(3df.2p) for  $\text{min1} \rightarrow \text{G}$  ( $[\text{SrNH}_2]^+ + [\text{HCO}]^+$ ) reaction ( $M=\text{Sr}$ ), taking into account the rotational energy. The quantum  $K$  number can be treated as an active rotor (solid lines) with different values for the angular momentum  $J$ ; or as an adiabatic rotor (dashed lines), where all the rotational energy is placed on the  $x,y$ -axes (blue diamonds, dashed line)(*case1*) ; equally distributed among the three axes (green crosses, dashed line) (*case2*) or in the  $z$ -axis (brown circles, dashed line) (*case3*).



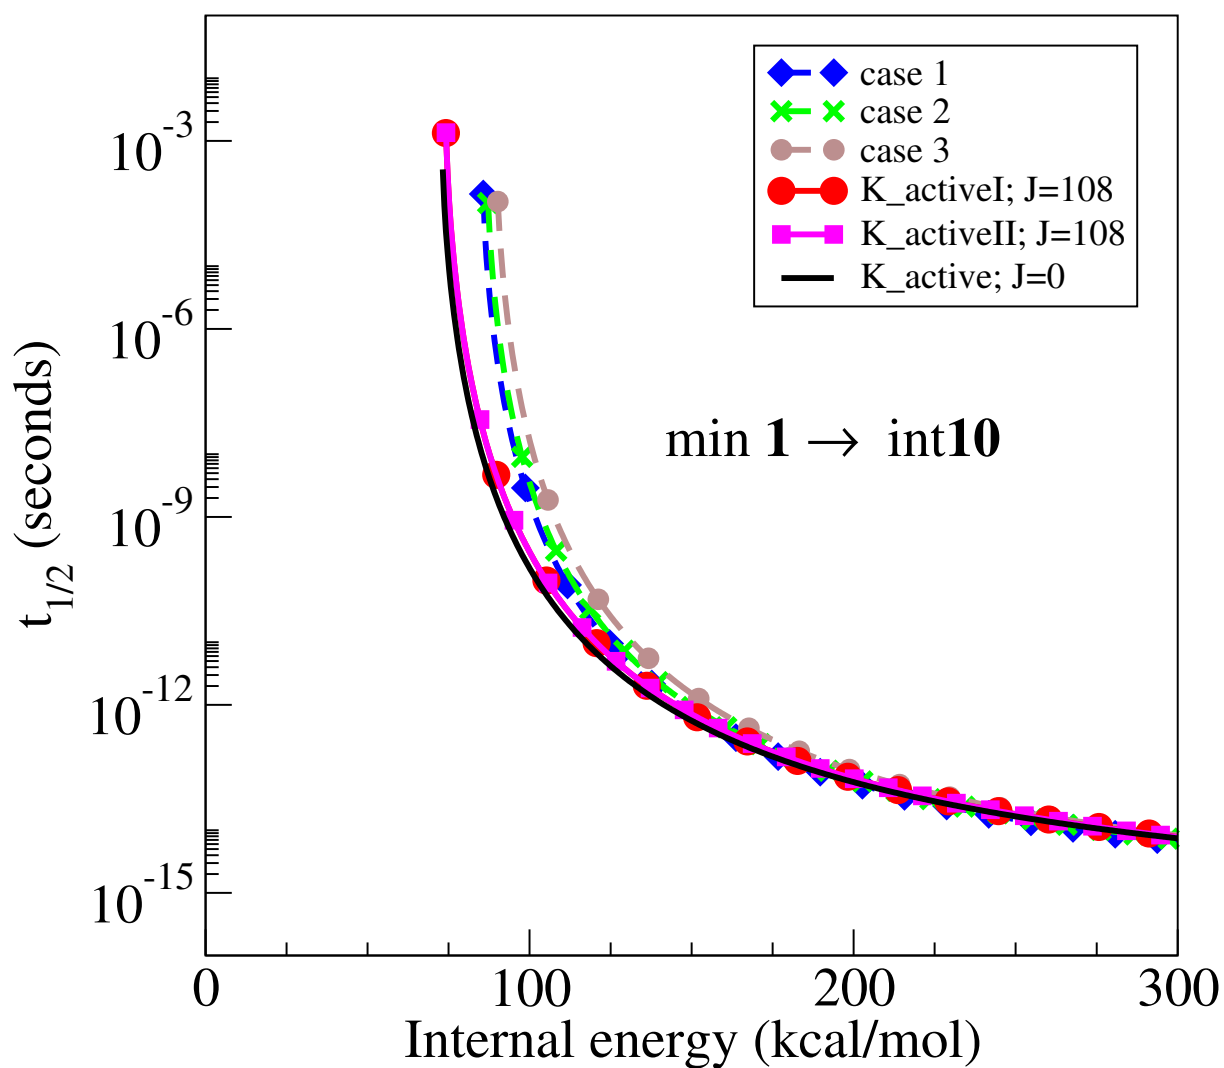

**Figure S.3-f:**  $k(E)$  computed at G96LYP/6-311+G(3df.2p) for min1  $\rightarrow$  int10 reaction ( $M=\text{Sr}$ ), taking into account the rotational energy. The quantum  $K$  number can be treated as an active rotor (solid lines) with different values for the angular momentum  $J$ ; or as an adiabatic rotor (dashed lines), where all the rotational energy is placed on the  $x,y$ -axes (blue diamonds, dashed line)(*case1*) ; equally distributed among the three axes (green crosses, dashed line) (*case2*) or in the  $z$ -axis (brown circles, dashed line) (*case3*).

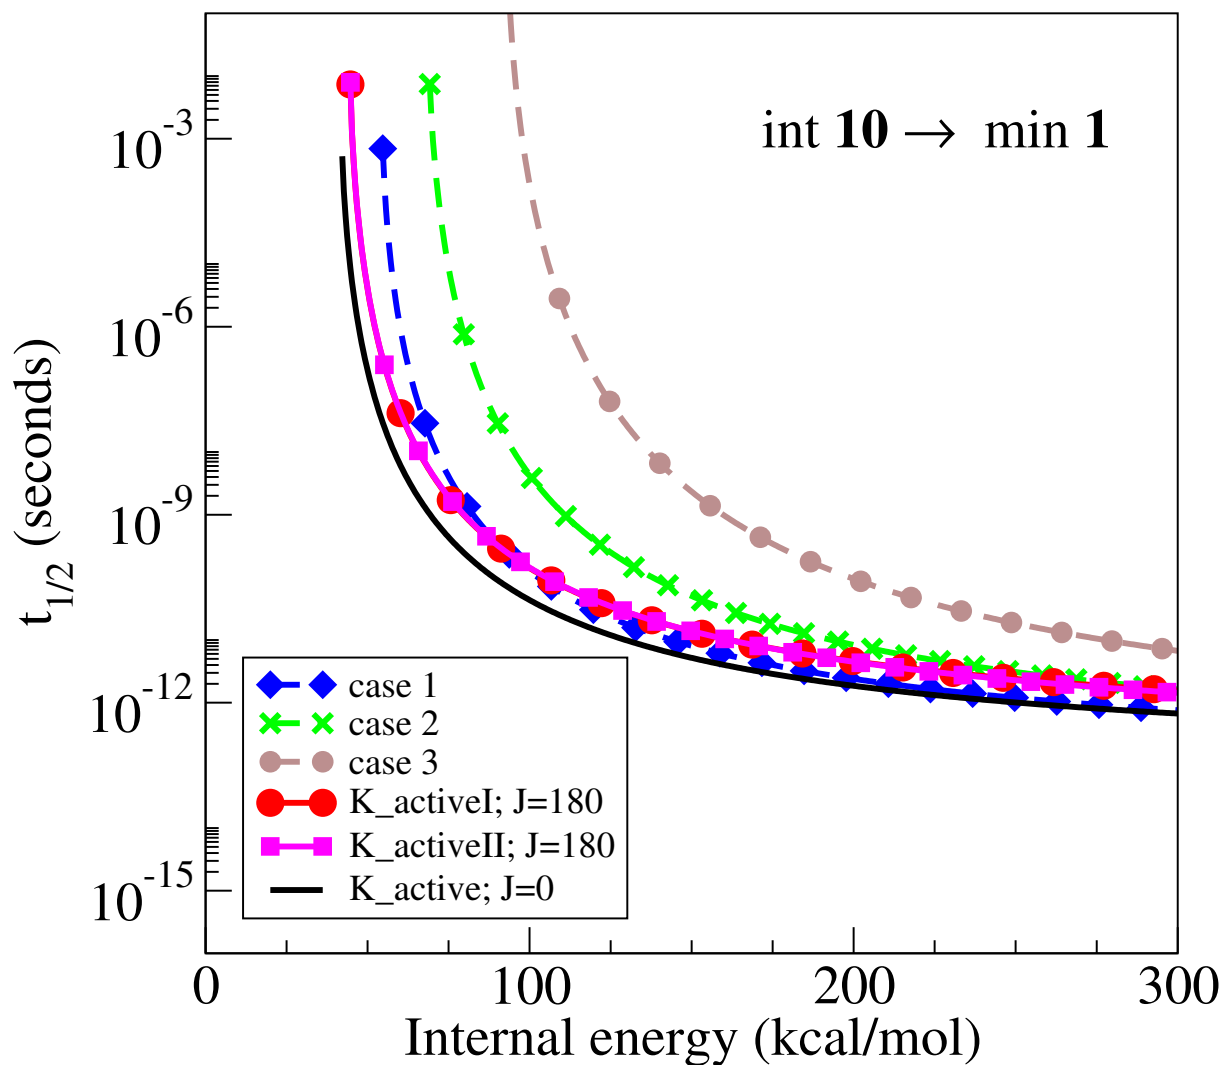

**Figure S.3-g:**  $k(E)$  computed at G96LYP/6-311+G(3df.2p) for int10  $\rightarrow$  min1 reaction (M=Sr), taking into account the rotational energy. The quantum  $K$  number can be treated as an active rotor (solid lines) with different values for the angular momentum  $J$ ; or as an adiabatic rotor (dashed lines), where all the rotational energy is placed on the  $x,y$ -axes (blue diamonds, dashed line)(*case1*) ; equally distributed among the three axes (green crosses, dashed line) (*case2*) or in the  $z$ -axis (brown circles, dashed line) (*case3*).

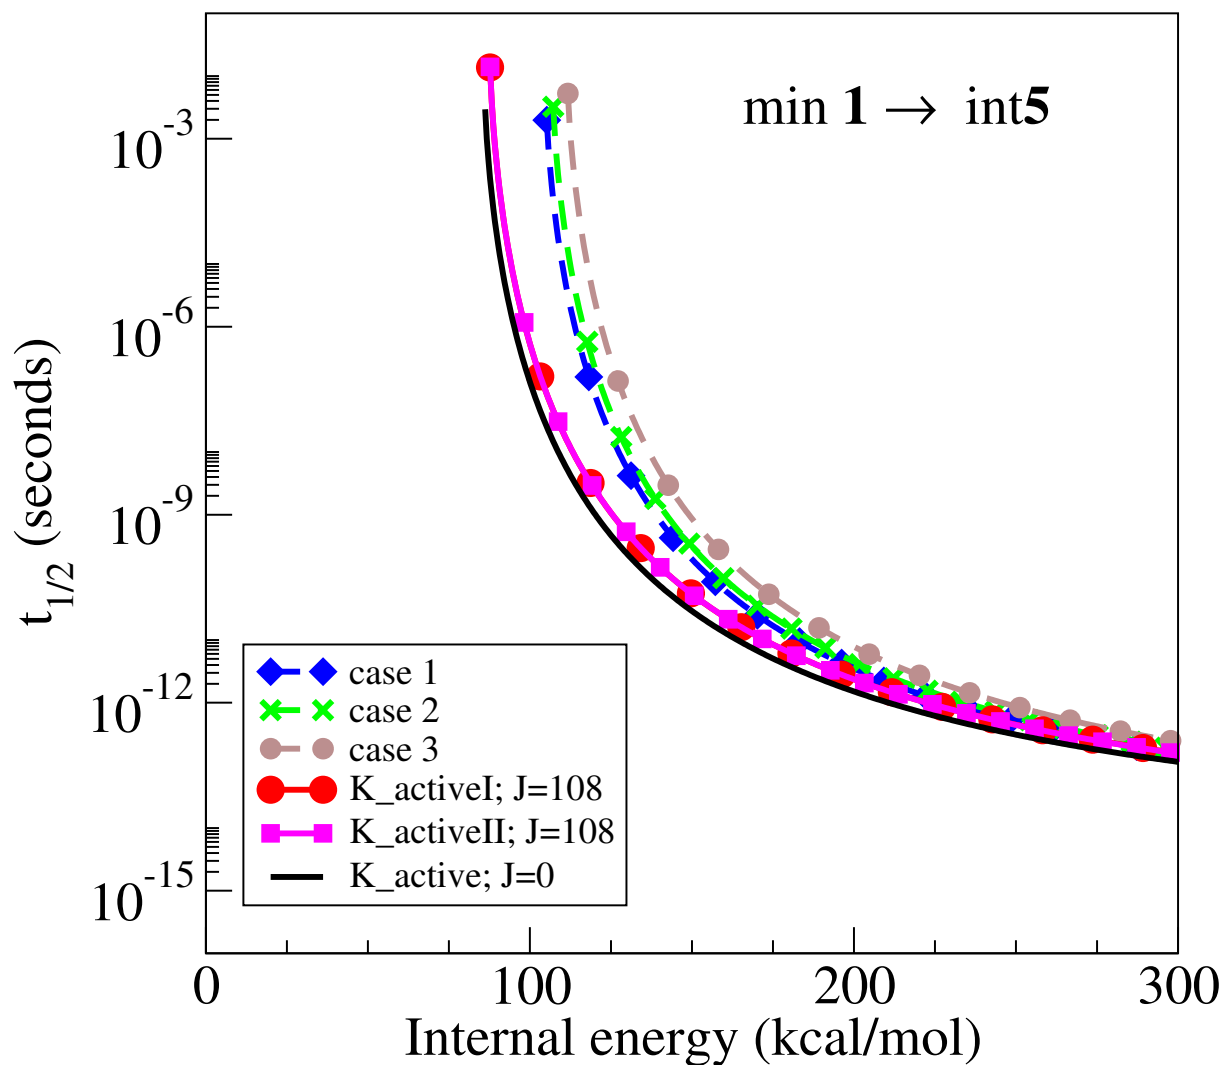

**Figure S.3-h:**  $k(E)$  computed at G96LYP/6-311+G(3df.2p) for min1  $\rightarrow$  int5 reaction (M=Sr), taking into account the rotational energy. The quantum  $K$  number can be treated as an active rotor (solid lines) with different values for the angular momentum  $J$ ; or as an adiabatic rotor (dashed lines), where all the rotational energy is placed on the  $x,y$ -axes (blue diamonds, dashed line)(*case1*) ; equally distributed among the three axes (green crosses, dashed line) (*case2*) or in the  $z$ -axis (brown circles, dashed line) (*case3*).

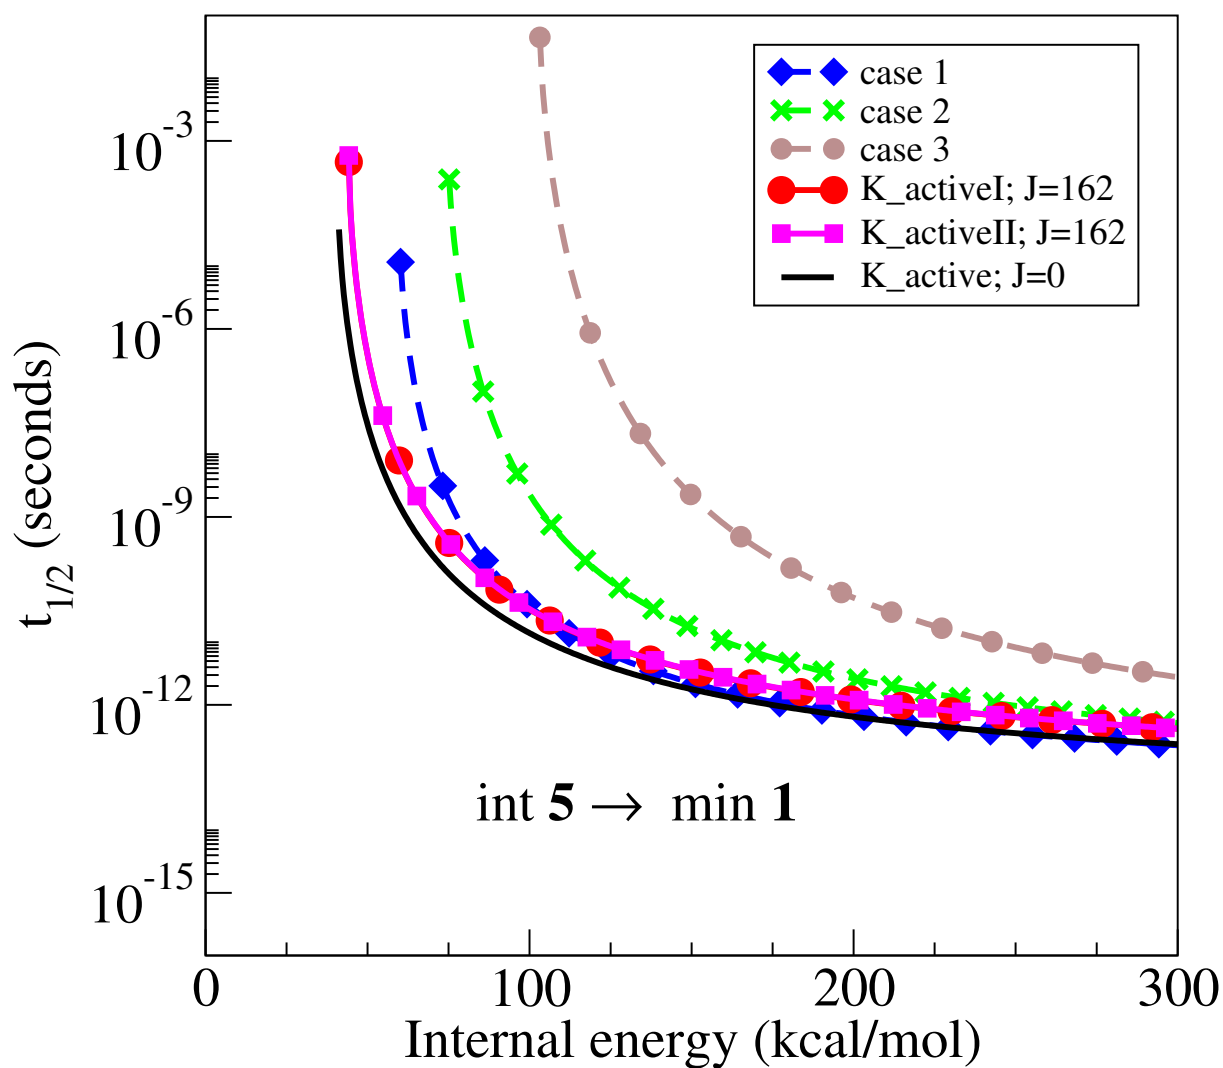

**Figure S.3-i:**  $k(E)$  computed at G96LYP/6-311+G(3df.2p) for  $\text{int5} \rightarrow \text{min1}$  reaction ( $M=\text{Sr}$ ), taking into account the rotational energy. The quantum  $K$  number can be treated as an active rotor (solid lines) with different values for the angular momentum  $J$ ; or as an adiabatic rotor (dashed lines), where all the rotational energy is placed on the  $x,y$ -axes (blue diamonds, dashed line)(*case1*) ; equally distributed among the three axes (green crosses, dashed line) (*case2*) or in the  $z$ -axis (brown circles, dashed line) (*case3*).
